1 Sociobehavioural characteristics and HIV incidence in  
2 29 sub-Saharan African countries:  
3 Unsupervised machine learning analysis

4 Aziza Merzouki<sup>a,\*</sup>, Janne Estill<sup>a,b</sup>, Kali Tal<sup>c</sup>, Olivia Keiser<sup>a</sup>

5 <sup>a</sup>Institute of Global Health, University of Geneva, Geneva, Switzerland

6 <sup>b</sup>Institute of Mathematical Statistics and Actuarial Science, University of Bern, Bern,  
7 Switzerland

8 <sup>c</sup>Institute of Primary Health Care (BIHAM), University of Bern, Bern, Switzerland

9  
10 \*Corresponding author:

11 Aziza Merzouki, PhD

12 Institute of Global Health, University of Geneva

13 Chemin des Mines 9, 1202 Geneva, Switzerland

14 Tel. +41 78 712 56 46

15 [FatmaAziza.Merzouki@unige.ch](mailto:FatmaAziza.Merzouki@unige.ch)

16  
17 \*Alternate corresponding author:

18 Olivia Keiser, PhD

19 Institute of Global Health, University of Geneva

20 Chemin des Mines 9, 1202 Geneva, Switzerland

21 Tel. +41 22 379 41 79

22 [olivia.keiser@unige.ch](mailto:olivia.keiser@unige.ch)

23  
24 Word count: Abstract 247 words; main text 2944 words; 1 table; 4 figures; 1 supplementary  
25 material file

26

## 27 Abstract

28 **Objective:** HIV incidence varies widely between sub-Saharan African (SSA) countries. This  
29 variation coincides with a substantial sociobehavioural heterogeneity, which complicates the  
30 design of effective interventions. In this study, we investigated how socio-behavioural  
31 heterogeneity in sub-Saharan Africa could account for the variance of HIV incidence between  
32 countries.

33 **Methods:** We used unsupervised machine learning to analyse data from the Demographic  
34 and Health Surveys of 29 SSA countries completed after 2010. We preselected 48  
35 demographic, socio-economic, behavioural and HIV-related attributes to describe each  
36 country. We used Principle Component Analysis to visualize sociobehavioural similarity  
37 between countries, and to identify the variables that accounted for most sociobehavioural  
38 variance in SSA. We used hierarchical clustering to identify groups of countries with similar  
39 sociobehavioural profiles, and we compared the distribution of HIV incidence and  
40 sociobehavioural variables within each cluster.

41 **Findings:** The most important characteristics, which explained 69% of sociobehavioural  
42 variance across SSA among the variables we assessed were: religion; male circumcision;  
43 number of sexual partners; literacy; uptake of HIV testing; women's empowerment; accepting  
44 attitude toward people living with HIV/AIDS; rurality; ART coverage; and, knowledge about  
45 AIDS. Our model revealed three groups of countries, each with characteristic  
46 sociobehavioural profiles. HIV incidence was mostly similar within each cluster and different  
47 between clusters (median(IQR); 0.5/1000(0.6/1000), 1.8/1000(1.3/1000) and  
48 5.0/1000(4.2/1000)).

49 **Conclusion:** Our findings suggest that sociobehavioural factors play a key role in determining  
50 the course of the HIV epidemic, and that similar techniques can help to design and predict  
51 the effects of targeted country-specific interventions to impede HIV transmission.

52

## 53 Research in context

### 54 Knowledge before this study

55 We searched PubMed with the terms: “HIV”, “inequality”, “factors” and “sub-Saharan Africa”  
56 for articles published in English before February 28th, 2019. The reviewed literature was  
57 usually limited to a certain sub-population, sub-national region, or country; but some recent  
58 studies covered up to 31 sub-Saharan African countries. Based on a relatively small number  
59 of variable (5 to 13), and using descriptive statistics, regressions and concentration indices,  
60 previous works analysed the association between socio-economic inequalities, male  
61 circumcision, high-risk sexual behaviour, or HIV-related stigma, with HIV testing, uptake of  
62 treatment, ART adherence, or HIV prevalence.

### 63 Contribution of this study

64 To our knowledge, this is the first study where unsupervised machine learning techniques  
65 (Principle Component Analysis and hierarchical clustering) were used to analyse the  
66 sociobehavioural heterogeneity in sub-Saharan Africa (SSA) and how it associates with the  
67 variability of HIV incidence in the region. We identified three distinct sociobehavioural  
68 profiles, which were associated with different geographical regions and different levels of HIV  
69 incidence in SSA. Because the association between the variability of HIV incidence across SSA  
70 and its underlying sociobehavioural factors is still not well understood, we believe that our  
71 analysis that compares 29 SSA countries based on 48 sociobehavioural characteristics brings  
72 significant value to the field. Identifying and comparing sociobehavioural profiles of countries  
73 helps to design and predict the effect of tailored country-specific interventions to impede HIV  
74 transmission.

## 75 Introduction

76 The burden of HIV in sub-Saharan Africa (SSA) is the heaviest in the world; in 2017, 70% of  
77 HIV-infected people lived in this region [1]. HIV prevalence and incidence vary widely between  
78 SSA countries. The region is heterogeneous and sociobehavioural and cultural factors vary  
79 widely within and between countries, complicating the design of effective interventions. This  
80 heterogeneity ensures that no “one-size-fits-all” approach will stop the epidemic. This is why  
81 WHO [2] highlights the need to use data and numerical methods to tailor interventions for  
82 specific populations and countries based on quantitative evidence.

83 So far, studies of HIV risk factors or risk factors for the uptake of interventions against HIV  
84 have generally been limited to specific sub-populations [3-5], sub-national regions [6-9] or  
85 countries [10-17]. Recent studies included up to 31 SSA countries, but narrowly focused their  
86 inquiries to examine, for example, the association between socio-economic inequalities [18],  
87 high-risk sexual behaviour [19], or HIV-related stigma [17, 20] with HIV testing, treatment  
88 uptake, ART adherence, or HIV prevalence. Most used standard statistical methods like  
89 descriptive statistics [5, 13], linear or logistic regression [3, 4, 20, 21], or concentration indices  
90 [6, 10, 18], to assess health inequity and the impact of 5 to 13 variables on the HIV epidemic.  
91 But, these methods do not tell us how HIV risk factors vary across SSA and which characteristic  
92 patterns are actually associated with different rates of new HIV infections in the region.  
93 Comparing and characterising SSA countries would allow us to test the hypothesis that  
94 sociobehavioural heterogeneity might account for spatial variance of HIV epidemic, and  
95 inform effective country-specific interventions.

96 We thus used unsupervised machine learning techniques (Principle Component Analysis and  
97 hierarchical clustering) to identify the most important factors of 48 national attributes that

98 might account for variability of HIV incidence across sub-Saharan Africa, and identified the  
99 sociobehavioural profiles that characterized different levels of HIV incidence, based on  
100 Demographic and Health Survey [22] data from 29 SSA countries.

101

## 102 Methods

### 103 Data

104 We used Demographic and Health Surveys (DHS) that contained data from 2010 or later.  
105 These DHS contained the most recent data that came from 29 SSA countries up to July 2018  
106 (**Table S1**). DHS typically gathers nationally representative data on health (including HIV-  
107 related data) and population (including social, behavioural, geographic and economic data)  
108 every 5 years, and provides individual- and country-level data.

109 We pre-selected the following variables because they covered topics that could relate to HIV  
110 and were available for all selected countries: age (under 25 vs older); rurality (rural vs urban);  
111 religion (Christian, Muslim, Folk/Popular religions, unaffiliated, others); marital status  
112 (married or in union vs widowed/divorced/other), number of wives (1,  $\geq 2$ ) or co-wives (0, 1,  
113  $\geq 2$ ); literacy (literate vs illiterate); media access (with access to newspaper, television and  
114 radio at least once a week vs without such access); employment (worked in the last 12 months  
115 and currently working vs others); wealth (Gini coefficient); age at first sexual intercourse (first  
116 sexual intercourse by age 15 vs older); general fertility (number of births to women of  
117 reproductive age in the last 3 years); contraception use (using any method of contraception  
118 vs not using any); condom use (belief that a woman is justified in asking condom use if she  
119 knows her husband has an STI vs belief that she is not justified); number of sexual partners in  
120 lifetime; unprotected higher risk sex (men who had sex with a non-marital, non-cohabiting  
121 partner in the last 12 months and did not use condom during last sexual intercourse vs not);  
122 paid sex (men who ever paid for sexual intercourse vs never paid for sex); unprotected paid  
123 sex (men who used condom during the last paid sexual intercourse in the last 12 months vs  
124 did not use condom); gender-based violence (wife beating justified for at least one specific

125 reason vs not justified for any reason); married women participation to decision making (yes  
126 vs no); gender of household head (female vs male); comprehensive correct knowledge about  
127 AIDS (yes vs no); HIV testing (ever receiving an HIV test vs never tested); male circumcision  
128 (yes vs no); ART coverage (i.e. percentage of people on antiretroviral treatment among those  
129 living with HIV); and accepting attitudes toward people living with HIV/AIDS (would buy fresh  
130 vegetables from a shopkeeper with AIDS vs would not); see **Table 1** for a complete summary  
131 of the variables.

132 We represented each country using 48 dimensions. Each dimension corresponded to an  
133 attribute in **Table 1**, such as the percentage of women married or in union, the mean number  
134 of sexual partners in a lifetime for men, the percentage of Christian populations and the Gini  
135 coefficient in this country. Data were represented as percentages; the mean number of sexual  
136 partners in lifetime was normalised using min-max normalisation. Most of these country-level  
137 data were exported from the DHS with the StatCompiler tool, except for data on religion that  
138 we obtained from Pew-Templeton Global Religious Futures Project [23], and ART coverage  
139 that we obtained from UNAIDS' AIDSinfo [24]. We used the latest (2018) UNAIDS estimates  
140 of national HIV incidence for the year 2016 [24, 25].

## 141 [Analysis](#)

142 We used Principle Component Analysis (PCA) [26, 27] to reduce the data from 48 to two  
143 dimensions (2D) so we could visualize sociobehavioural similarity between SSA countries;  
144 countries closest to each other on the 2D space corresponded to similar countries in terms of  
145 demographic, socio-economic and behavioural characteristics. The principle components  
146 (PCs) consist of a linear combination of the initial 48 dimensions and can therefore be



147 interpreted in terms of the original variables. The first two PCs, which explain the most  
148 variance, represent the axes of the 2D-space used for visualization.

149 We used hierarchical clustering to identify similar SSA countries in terms of sociobehavioural  
150 characteristics. Pairwise countries dissimilarity was calculated using the Euclidian distance  
151 (**Equation S1**). These distances were used by the hierarchical clustering algorithm to create a  
152 *dendrogram* with 29 terminal nodes representing the countries to be grouped. Cutting the  
153 dendrogram at a certain height produces clusters of similar countries. The number of clusters  
154 depends on the height at which the tree is cut. To measure the quality of the clustering results  
155 and to select the final number of clusters, we used the Silhouette Index (**Equation S4**).

156 Having clustered countries based on sociobehavioural variables, we then determined if  
157 countries with similar sociobehavioural patterns tend to have similar HIV incidence. We used  
158 *box plots* to visualize the distribution of the HIV incidence within each cluster of countries. To  
159 identify the sociobehavioural variables that characterize the resulting clusters, we visualized  
160 and compared the distribution of these variables within each cluster with *density plots*.

161 We used the open source R language, version 3.5.1 for our analysis. Code and country-level data are  
162 available on GitLab ([https://gitlab.com/AzizaM/dhs\\_ssa\\_countries\\_clustering](https://gitlab.com/AzizaM/dhs_ssa_countries_clustering)).

## 163 Results

164 The surveys we used in this analysis included 594'644 persons (183'310 men and 411'334  
165 women), ranging from 9'552 in Lesotho to 56'307 in Nigeria. Adult HIV incidence ranged from  
166 0.14/1000 in Niger to 19.7/1000 in Lesotho in 2016. HIV prevalence ranged from 0.4% in Niger  
167 to 23.9% in Lesotho (**Table S1**). Sociobehavioural characteristics varied widely between SSA  
168 countries (**Table 1**).

### 169 Visualizing the SSA countries: Geographical and sociobehavioural similarities

170 Using PCA, we found that the first principle component (PC) explained 49.5% and the second  
171 19.5% of the total sociobehavioural variance across SSA among the 48 variables we  
172 considered (**Figure 1**). The original sociobehavioural variables that contributed most to these  
173 PCs were religion (12.6% for Muslim and 12.1% for Christian populations), male circumcision  
174 (9.4%), number of sexual partners (7.8% for men and 3.4% for women), literacy (6.1 % for  
175 women and 3.2% for men), HIV testing (5.5% for men and 5.4% for women), women's  
176 participation in decision making (3.8%), an accepting attitude towards those living with  
177 HIV/AIDS (3.6% for women and 3.2% for men), rurality (3.0% for women and 2.7% for men),  
178 ART coverage (2.5%), and women's knowledge about AIDS (2.5%) (**Figure 1, right panel** and  
179 **Figure S1**).

180 Projecting the 29 SSA countries in two dimensions produced a roughly V-shaped scatterplot  
181 (**Figure 1, left panel**). As the two dimensions combine the 48 original sociobehavioural  
182 variables, we explored the scatterplot given sociobehavioural trends over the 2D-space  
183 (**Figure 1, right panel**). At the end of the V-shape's left branch, Eastern and Southern African  
184 countries (such as Namibia, Zimbabwe, Malawi, Zambia and Uganda) lied next to each other.  
185 In these countries, less men are circumcised, but the percentage of literate people who had

186 accepting attitudes toward people living with HIV/AIDS (PLWHA) was higher and so was  
187 uptake of HIV testing. Knowledge about AIDS and ART coverage were also high. The end of  
188 the right branch, in the upper right quadrant, included countries from the Sahel region, like  
189 Senegal, Burkina Faso, Mali, Niger and Chad, where the percentage of Muslims is higher and  
190 people have fewer sexual partners. The lower tip of the V-shape included countries in West  
191 and Central Africa, like Liberia, Ghana, Côte d'Ivoire, Democratic Republic of the Congo, and  
192 Gabon, where people have more sexual partners, more men are circumcised, and the rural  
193 population is smaller.

#### 194 [Clustering the SSA countries and analysis of the associated HIV incidence](#)

195 The hierarchical clustering of the 29 SSA countries built a dendrogram (**Figure 2, left panel**).  
196 Cluster compactness and separation were optimal (maximum silhouette index = 0.3) when  
197 we cut the dendrogram at a height that separated countries into three groups (**Figure 2, right**  
198 **panel**).

199 The countries of the first cluster, in yellow, had the lowest HIV incidence (median of 0.5/1000  
200 population) (**Figure 3**). This cluster included countries from the Sahel Region, where the  
201 population was mostly rural (median of 71.1% for men) and Muslim (median of 86.2%). On  
202 the one hand, many of the factors that characterized this cluster could account for low HIV  
203 incidence and prevalence in these countries. Countries were characterized by high  
204 proportions of circumcised men (median of 95.0%), high percentages of women who were  
205 married or lived in union (median of 70.6%), late sexual initiation for men (median of 1.9% of  
206 men who had their first sexual intercourse by the age of 15), low numbers of sexual partners  
207 (median of 3.5 partners for men), low percentages of unprotected higher-risk sex (median of  
208 9.7% for men) and low percentages of men having ever paid for sex (median of 3.9%).

209 Polygyny [9, 28], an institutionalized form of sexual concurrency, was also frequent in this  
210 region (median of 22.3 %). On the other hand, this cluster was also characterized by frequent  
211 belief that wife beating is justified (median of 61.2% for women), and low levels of literacy  
212 (median of 29.0% for women). Participation of married women in decision making (median  
213 of 18.5%), contraceptive prevalence (median of 13.9%), and knowledge about AIDS (median  
214 of 23.7 % for women) was also low. These countries had low percentages of people ever  
215 tested for HIV (median of 19.2% for men; 36.6% for women), low ART coverage (median of  
216 38.0%) and low levels of acceptance of PLWHA (Median of 47.4% for men); see **Figure 4**.

217 The countries of the second cluster, coloured in orange, included countries from West and  
218 Central Africa. These countries had a rather low HIV incidence (median of 1.8/1000  
219 population), though Mozambique was a remarkable outlier, with a high HIV incidence  
220 (9.8/1000 population) (**Figure 3**). Like the first cluster, these countries had a high percentage  
221 of circumcised men (median of 97.0%, except in Mozambique where only 48.4% of men were  
222 circumcised). However, these countries were also characterized by the lowest proportions of  
223 rural populations (median of 49.0% for men), the highest numbers of sexual partners (median  
224 of 10.1 for men), early sexual initiation (median of 12.0 % of men who had their first sexual  
225 intercourse by the age of 15), and more frequent unprotected high-risk sex (median of 24.3%  
226 for men) and paid sexual intercourse (median of 9.5% for men). HIV testing uptake (median  
227 of 25.8% for men and 48.6% for women), knowledge about AIDS (median of 23.6% for  
228 women), and ART coverage (median of 31.0%) were all low.

229 The third cluster, in red, included Southern and East African countries. These countries had  
230 high HIV incidence (median of 5.0/1000 population), except two countries that had a lower  
231 HIV incidence: Rwanda (1.1/1000 population) and Burundi (0.5/1000) (**Figure 3**). Countries  
232 belonging to the third cluster were characterized by the lowest percentage of circumcised  
233 men (median of 27.9%). But they were also the ones with the highest uptake of HIV testing  
234 (median of 65.2% for men; 83.3% for women) and ART (median of 61.0%), and the highest  
235 percentage with knowledge about HIV (median of 54.6% for women) and accepting attitudes  
236 towards PLWHA (median of 84.4% for men). This cluster was also characterized by the highest  
237 percentage of literacy (median of 80.2% for women), high use of contraceptives (median of  
238 42.6%), low percentages of unprotected high-risk sex (median of 9.8% for men) and higher  
239 percentages of married women participating in decision making (median of 67.7%) and  
240 women-headed households (median of 31.0%). Rwanda and Burundi had the lowest HIV  
241 incidence and were characterized by a lower number of sexual partners (Rwanda, 2.6;  
242 Burundi, 2.1) vs a median of 6.3 partners for men in the other countries of the third cluster.  
243 They also had larger per capita rural populations (Rwanda, 80.4%; Burundi, 89.4%) vs a  
244 median of 61.3% for women in the other countries of the same cluster.

## 245 Discussion

246 Using hierarchical clustering, we identified most important characteristics that explained 69%  
247 of the sociobehavioural variance among the variables we assessed in SSA. We discovered  
248 three groups of countries with similar sociobehavioural patterns, and HIV incidence was also  
249 similar within each cluster.

250 In the first cluster, PLWHA were not widely accepted, and the population had an overall low-  
251 level knowledge about HIV. Stigma may be more widespread in this region and explain the  
252 lower uptake of interventions among people who are HIV-positive. The relatively low number  
253 of people who are living with HIV lowers the general public's exposure to this group and may  
254 increase stigma [29]. Stigma can also result from cultural and religious beliefs that link  
255 HIV/AIDS with sexual transgressions, immorality and sin [30, 31].

256 We speculate that the apparent contradiction between the presence of many high-risk factors  
257 and low HIV incidence in most countries of the second cluster could be explained by the high  
258 proportion of circumcised men. In line with this theory, Mozambique, the only country in this  
259 cluster with very high HIV prevalence and incidence, had few circumcised men. Previous  
260 observational studies and trials have confirmed the protective effect of male circumcision [7,  
261 8, 32, 33].

262 Countries of the third cluster, with the highest HIV incidence, were also the ones with the  
263 highest knowledge about AIDS [29], ART coverage, uptake of HIV testing, and with the most  
264 accepting attitudes toward PLWHA. They also had the lowest percentage of unprotected  
265 higher risk sex. These findings are consistent with earlier studies that found broad ART  
266 coverage may reduce social distancing towards PLWHA and HIV-related stigma in the general

267 population [20, 34]. Reduced social distancing and stigma is associated with higher uptake of  
268 voluntary HIV counselling and testing [17, 35], and less sexual risk-taking among HIV positive  
269 people [21].

270 The high HIV incidence in Mozambique could be caused by any combination of the following  
271 factors: a high number of sexual partners; a low level of male circumcision; a low level of  
272 literacy and knowledge about AIDS. These, in turn, could be responsible for low uptake of HIV  
273 testing and ART. In contrast, many West and Central African countries with population  
274 characteristics like Mozambique, e.g., sexual practices, literacy, knowledge about AIDS, HIV  
275 testing and ART coverage, had much lower HIV prevalence and incidence, possibly because  
276 males were circumcised at twice the rate. It is also possible that despite a low uptake of male  
277 circumcision, the combination of lower numbers of sexual partners, higher per capita rural  
278 populations, more literacy, more accurate knowledge about AIDS, more HIV testing, and  
279 broader ART coverage could account for the lower HIV incidence in Rwanda and Burundi.

280 The cross-sectional nature of our data makes it impossible to determine precedence and  
281 causality between the sociobehavioural characteristics we measured and HIV prevalence and  
282 incidence. But the associations we identified can open lines of inquiry for researchers. Our  
283 study had the advantage of allowing us to compare countries and regions, but ecological  
284 studies that use aggregated data are prone to confounding and ecological fallacy [36]. Africa  
285 is an exceedingly diverse continent with many distinct sub-populations, so a study based on  
286 national population averages cannot explain HIV variation within countries. Therefore, we  
287 intend to repeat the study at a lower level of granularity, using regional- and individual-level  
288 data to capture differences within countries and learn more about sociobehavioural factors  
289 that affect the sub-populations that are most at risk.

290 Our work has some other limitations. We used model estimates for HIV incidence, which may  
291 diverge from reality [37]. And even though we included many more variables from the DHS  
292 and other sources than is common practice [3, 4, 10, 11, 18, 19], we still had to exclude many  
293 more, including other sexually transmitted diseases, alcohol consumption, ART adherence  
294 and drug resistance data. Some of the variables we wanted to include were not collected in  
295 the DHS or were missing from some countries.

296 Our use of unsupervised machine learning allowed us to identify the most important  
297 characteristics among the variables we assessed that explained 69% of the sociobehavioural  
298 variance in SSA countries. We captured complex patterns of sociobehavioural characteristics  
299 shared by countries with similar HIV incidence, suggesting that the combination of  
300 sociobehavioural factors play a key role in determining the course of the HIV epidemic, and  
301 that similar techniques can be used to design and predict the effect of targeted country-  
302 specific interventions to impede HIV transmission.

303



## 304 Acknowledgements

305 We thank Zofia Baranczuk for helpful discussions.

## 306 Funding

307 This work was supported by the Swiss National Science Foundation [grant n° 163878].

## 308 Conflict of interest

309 We declare no competing interests.

## 310 References

- 311 1. Fact sheet - World AIDS Day 2018. Available at:  
312 [http://www.unaids.org/sites/default/files/media\\_asset/UNAIDS\\_FactSheet\\_en.pdf](http://www.unaids.org/sites/default/files/media_asset/UNAIDS_FactSheet_en.pdf)
- 313 2. Global Health Sector Strategy on HIV 2016-2021: Towards Ending AIDS. Available at:  
314 [http://apps.who.int/iris/bitstream/handle/10665/246178/WHO-HIV-2016.05-](http://apps.who.int/iris/bitstream/handle/10665/246178/WHO-HIV-2016.05-eng.pdf?sequence=1)  
315 [eng.pdf?sequence=1](http://apps.who.int/iris/bitstream/handle/10665/246178/WHO-HIV-2016.05-eng.pdf?sequence=1).
- 316 3. Ashaba S, Cooper-Vince C, Maling S, Rukundo GZ, Akena D, Tsai AC. Internalized HIV  
317 stigma, bullying, major depressive disorder, and high-risk suicidality among HIV-  
318 positive adolescents in rural Uganda. *Global Mental Health* **2018**; 5.
- 319 4. Kidman R, Anglewicz P. Are adolescent orphans more likely to be HIV-positive? A  
320 pooled data analyses across 19 countries in sub-Saharan Africa. *Journal of*  
321 *Epidemiology and Community Health* **2016**; 70(8): 791-7.
- 322 5. Sangowawa AO, Owoaje ET. Experiences of discrimination among youth with  
323 HIV/AIDS in Ibadan, Nigeria. *Journal of Public Health in Africa* **2012**; 3(1): 10.
- 324 6. Pons-Duran C, González R, Quintó L, et al. Association between HIV infection and  
325 socio-economic status: evidence from a semirural area of southern Mozambique.  
326 *Tropical Medicine & International Health* **2016**; 21(12): 1513-21.
- 327 7. Bailey RC, Moses S, Parker CB, et al. Male circumcision for HIV prevention in young  
328 men in Kisumu, Kenya: a randomised controlled trial. **2007**; 369: 14.
- 329 8. Gray RH, Kigozi G, Serwadda D, et al. Male circumcision for HIV prevention in men in  
330 Rakai, Uganda: a randomised trial. **2007**; 369: 10.

- 331 9. Eaton JW, Takavarasha FR, Schumacher CM, et al. Trends in Concurrency, Polygyny,  
332 and Multiple Sex Partnerships During a Decade of Declining HIV Prevalence in  
333 Eastern Zimbabwe. *The Journal of Infectious Diseases* **2014**; 210(suppl\_2): S562-S8.
- 334 10. Kim SW, Skordis-Worrall J, Haghparast-Bidgoli H, Pulkki-Brännström A-M. Socio-  
335 economic inequity in HIV testing in Malawi. *Global Health Action* **2016**; 9(1): 31730.
- 336 11. Lakew Y, Benedict S, Haile D. Social determinants of HIV infection, hotspot areas and  
337 subpopulation groups in Ethiopia: evidence from the National Demographic and  
338 Health Survey in 2011. *BMJ Open* **2015**; 5(11): e008669.
- 339 12. Antelman G, Kaaya S, Wei RL, et al. Depressive symptoms increase risk of HIV disease  
340 progression and mortality among women, in Tanzania. *J AIDS-J Acq Imm Def* **2007**;  
341 44(4): 470-7.
- 342 13. Smith Fawzi MC, Ng L, Kanyanganzi F, et al. Mental Health and Antiretroviral  
343 Adherence Among Youth Living With HIV in Rwanda. *PEDIATRICS* **2016**; 138(4):  
344 e20153235-e.
- 345 14. Tsai AC, Venkataramani AS. The causal effect of education on HIV stigma in Uganda:  
346 Evidence from a natural experiment. *Social Science & Medicine* **2015**; 142: 37-46.
- 347 15. McGillen JB, Stover J, Klein DJ, et al. The emerging health impact of voluntary  
348 medical male circumcision in Zimbabwe: An evaluation using three epidemiological  
349 models. *PLOS ONE* **2018**; 13(7): e0199453.
- 350 16. Gregson S, Gonese E, Hallett TB, et al. HIV decline in Zimbabwe due to reductions in  
351 risky sex? Evidence from a comprehensive epidemiological review. *International*  
352 *Journal of Epidemiology* **2010**; 39(5): 1311-23.

- 353 17. Kelly JD, Weiser SD, Tsai AC. Proximate Context of HIV Stigma and Its Association  
354 with HIV Testing in Sierra Leone: A Population-Based Study. *AIDS and Behavior* **2016**;  
355 20(1): 65-70.
- 356 18. Hajizadeh M, Sia D, Heymann S, Nandi A. Socioeconomic inequalities in HIV/AIDS  
357 prevalence in sub-Saharan African countries: evidence from the Demographic Health  
358 Surveys. *International Journal for Equity in Health* **2014**; 13(1): 18.
- 359 19. Kenyon C, Buyze J, Schwartz IS. Strong association between higher-risk sex and HIV  
360 prevalence at the regional level: an ecological study of 27 sub-Saharan African  
361 countries. *F1000Research* **2018**; 7: 1879.
- 362 20. Chan B, Tsai A. Trends in HIV-Related Stigma in the General Population During the  
363 Era of Antiretroviral Treatment Expansion: An Analysis of 31 Sub-Saharan African  
364 Countries. *Open Forum Infectious Diseases* **2015**; 2(suppl\_1).
- 365 21. Delavande A, Sampaio M, Sood N. HIV-related social intolerance and risky sexual  
366 behavior in a high HIV prevalence environment. *Social Science & Medicine* **2014**;  
367 111: 84-93.
- 368 22. The DHS Program - Quality information to plan, monitor, and improve population,  
369 health and nutrition programs. Available at: <http://www.dhsprogram.com>.
- 370 23. Religions in Africa | African Religions | PEW-GRF.
- 371 24. AIDSinfo | UNAIDS. Available at: <http://aidsinfo.unaids.org/>.
- 372 25. Estimates Methods 2018. Available at:  
373 [http://aidsinfo.unaids.org/documents/estimates\\_methods\\_2018.pdf](http://aidsinfo.unaids.org/documents/estimates_methods_2018.pdf).
- 374 26. Hastie T, Tibshirani R, Friedman J. *The Elements of Statistical Learning: Data Mining,*  
375 *Inference, and Prediction*. Second Edition ed: Springer.

- 376 27. James G, Witten D, Hastie T, Tibshirani R. An introduction to statistical learning: with  
377 applications in R. New York: Springer, **2013**.
- 378 28. Reniers G, Tfamily R. Polygyny, Partnership Concurrence, and HIV Transmission in Sub-  
379 Saharan Africa. *Demography* **2012**; 49(3): 1075-101.
- 380 29. Chan BT, Tsai AC. Personal contact with HIV-positive persons is associated with  
381 reduced HIV-related stigma: cross-sectional analysis of general population surveys  
382 from 26 countries in sub-Saharan Africa. *Journal of the International AIDS Society*  
383 **2017**; 20(1): 21395.
- 384 30. Campbell C, Foulis CA, Maimane S, Sibiya Z. "I Have an Evil Child at My House":  
385 Stigma and HIV/AIDS Management in a South African Community. *American Journal*  
386 *of Public Health* **2005**; 95(5): 808-15.
- 387 31. Mbonu NC, van den Borne B, De Vries NK. Stigma of People with HIV/AIDS in Sub-  
388 Saharan Africa: A Literature Review. *Journal of Tropical Medicine* **2009**; 2009: 1-14.
- 389 32. Lei Jh, Liu Lr, Wei Q, et al. Circumcision Status and Risk of HIV Acquisition during  
390 Heterosexual Intercourse for Both Males and Females: A Meta-Analysis. *PLOS ONE*  
391 **2015**; 10(5): e0125436.
- 392 33. Sharma SC, Raison N, Khan S, Shabbir M, Dasgupta P, Ahmed K. Male circumcision  
393 for the prevention of human immunodeficiency virus (HIV) acquisition: a meta-  
394 analysis. *BJU International* **2018**; 121(4): 515-26.
- 395 34. Chan BT, Tsai AC, Siedner MJ. HIV Treatment Scale-Up and HIV-Related Stigma in  
396 Sub-Saharan Africa: A Longitudinal Cross-Country Analysis. *American Journal of*  
397 *Public Health* **2015**; 105(8): 1581-7.

- 398 35. Kalichman SC. HIV testing attitudes, AIDS stigma, and voluntary HIV counselling and  
399 testing in a black township in Cape Town, South Africa. *Sexually Transmitted*  
400 *Infections* **2003**; 79(6): 442-7.
- 401 36. Levin KA. Study Design VI - Ecological Studies. *Evidence Based Dentistry* **2006**; 7: 108.
- 402 37. Nsanzimana S, Remera E, Kanters S, et al. Household survey of HIV incidence in  
403 Rwanda: a national observational cohort study. *The Lancet HIV* **2017**; 4(10): e457-  
404 e64.
- 405

406 **Table 1 - Socio-economic and behavioural variables included in the analysis.**

407 Median values across all 29 countries are shown with the minimum and maximum values.

408 \*ART = antiretroviral therapy.

| Attribute | Topic       | Variable                             | Stratification | Categories | Median<br>(min - max)  |                        |
|-----------|-------------|--------------------------------------|----------------|------------|------------------------|------------------------|
| 1         | Demographic | Age under 25                         | Men            |            | 37.6%<br>(28.1%-44.1%) |                        |
| 2         |             |                                      | Women          |            | 39.9%<br>(34.4%-45.0%) |                        |
| 3         |             | Rurality                             | Men            |            | 56.5%<br>(12.9%-85.1%) |                        |
| 4         |             |                                      | Women          |            | 59.7%<br>(11.3%-89.4%) |                        |
| 5         |             | Religion                             |                |            | Christian              | 74.9%<br>(0.8%-97.8%)  |
| 6         |             |                                      |                |            | Muslim                 | 13.9%<br>(0.0%-98.5%)  |
| 7         |             |                                      |                |            | Folk/Popular           | 1.7%<br>(0.0%-35.7%)   |
| 8         |             |                                      |                |            | Unaffiliated           | 2.5%<br>(0.0%-18.0%)   |
| 9         |             |                                      |                |            | Others                 | 0.2%<br>(0.0%-2.7%)    |
| 10        |             | Married or in union                  |                |            | Men                    | 50.5%<br>(28.8%-65.2%) |
| 11        |             |                                      |                |            | Women                  | 63.5%<br>(34.0%-88.5%) |
| 12        |             | Number of wives or co-wives          | Men            |            | 1                      | 87.5%<br>(72.0%-97.5%) |
| 13        |             |                                      |                |            | ≥2                     | 12.5%<br>(2.5%-28.0%)  |
| 14        |             |                                      | Women          |            | 0                      | 75.5%<br>(57.6%-93.2%) |
| 15        |             |                                      |                |            | 1                      | 17.2%<br>(1.9%-30.4%)  |
| 16        |             |                                      |                |            | ≥2                     | 4.3%<br>(0.4%-12.3%)   |
| 17        |             | Female headed household              |                |            |                        | 28.0%<br>(9.3%-43.9%)  |
| 18        |             | Literacy                             |                |            | Men                    | 79.0%<br>(37.6%-94.2%) |
| 19        |             |                                      |                |            | Women                  | 58.1%<br>(14.0%-97.0%) |
| 20        |             | Access to media at least once a week |                | Men        |                        | 9.9%<br>(1.7%-47.5%)   |



|    |                   |                                                                                            |                        |       |                        |                        |
|----|-------------------|--------------------------------------------------------------------------------------------|------------------------|-------|------------------------|------------------------|
| 21 |                   |                                                                                            | Women                  |       | 5.6%<br>(0.3%-21.3%)   |                        |
| 22 | Employment        | Worked in the last 12 months and is currently working                                      | Men                    |       | 76.9%<br>(55.9%-92.8%) |                        |
| 23 |                   |                                                                                            | Women                  |       | 61.8%<br>(24.5%-77.8%) |                        |
| 24 | Wealth            | Gini coefficient <sup>1</sup>                                                              |                        |       | 30.0%<br>(10.0%-50.0%) |                        |
| 25 | Sexual behaviour  | First sex by age 15                                                                        | Men                    |       | 8.0%<br>(0.8%-25.4%)   |                        |
| 26 |                   |                                                                                            | Women                  |       | 18.0%<br>(2.6%-28.8%)  |                        |
| 27 |                   | Fertility rate                                                                             | Women                  |       | 17.5%<br>(11.8%-26.9%) |                        |
| 28 |                   | Use of contraception                                                                       | Women                  |       | 21.7%<br>(5.4%-50.2%)  |                        |
| 29 |                   | Woman is justified asking for condom if husband has a sexually transmitted infection (STI) | Men                    |       | 88.2%<br>(70.3%-98.5%) |                        |
| 30 |                   |                                                                                            | Women                  |       | 81.5%<br>(14.3%-97.3%) |                        |
| 31 |                   | Mean number of sexual partners in lifetime                                                 | Men                    |       | 6.3<br>(1.9-15.3)      |                        |
| 32 |                   |                                                                                            | Women                  |       | 2.2<br>(1.2-5.1)       |                        |
| 33 |                   | Unprotected higher risk sex                                                                | Men                    |       | 15.7%<br>(1.6%-43.2%)  |                        |
| 34 |                   |                                                                                            | Women                  |       | 11.10%<br>(0.3%-30.3%) |                        |
| 35 |                   | Ever paid for sexual intercourse                                                           | Men                    |       | 7.7%<br>(1.4%-35.0%)   |                        |
| 36 |                   | Unprotected paid sexual intercourse                                                        | Men                    |       | 0.8%<br>(0.1%-8.1%)    |                        |
| 37 |                   | Gender-based violence                                                                      | Wife beating justified | Men   |                        | 32.3%<br>(12.5%-59.5%) |
| 38 |                   |                                                                                            |                        | Women |                        | 45.7%<br>(16.2%-76.3%) |
| 39 | Women empowerment | Married women participating in decision making                                             |                        |       | 49.9%<br>(9.1%-78.0%)  |                        |
| 40 |                   | Married women who disagree with all reason justifying wife beating                         |                        |       | 47.7%<br>(18.7%-80.9%) |                        |
| 41 | HIV/AIDS          | Correct knowledge about AIDS                                                               | Men                    |       | 35.8%<br>(17.4%-68.8%) |                        |

|    |                                  |                                                |       |  |                        |
|----|----------------------------------|------------------------------------------------|-------|--|------------------------|
| 42 |                                  |                                                | Women |  | 27.8%<br>(10.9%-66.9%) |
| 43 |                                  | Ever received an HIV test                      | Men   |  | 30.5%<br>(7.8%-80.8%)  |
| 44 |                                  |                                                | Women |  | 49.6%<br>(14.5%-85.5%) |
| 45 |                                  | Male circumcision                              |       |  | 94.0%<br>(14.3%-99.4%) |
| 46 |                                  | ART* coverage 2015                             |       |  | 41.0%<br>(18.0%-76.0%) |
| 47 | Accepting attitudes toward PLWHA | Would buy vegetables from shopkeeper with AIDS | Men   |  | 57.5%<br>(32.4%-92.1%) |
| 48 |                                  |                                                | Women |  | 53.1%<br>(23.7%-89.2%) |

409

---

<sup>1</sup> The Gini coefficient indicates the level of wealth concentration in a country.

410 **Figure 1 - Visualization of the sociobehavioural similarity between SSA countries using**  
 411 **PCA.**  
 412 **Left panel: Projection of the SSA countries on a 2D-space, based on their socio-economic**  
 413 **and behavioural factors.** The two dimensions (first two PCs), Dim1 and Dim2, explained 69%  
 414 of the variance in the data. Countries are coloured based on their HIV incidence per 1000  
 415 population (15-49) in 2016.  
 416 **Right panel: Correlation plot of the original variables with the first and second dimensions**  
 417 **(Dim1, Dim2).** The variable transparency represents its contribution (in %) to the two  
 418 dimensions. Moving along a variable's vector leads toward a region of the 2D-space where  
 419 the variable levels tend to be higher, e.g. upper right quadrant contains mainly Muslim  
 420 countries, while upper left quadrant contains countries with higher levels of HIV testing and  
 421 knowledge about AIDS.

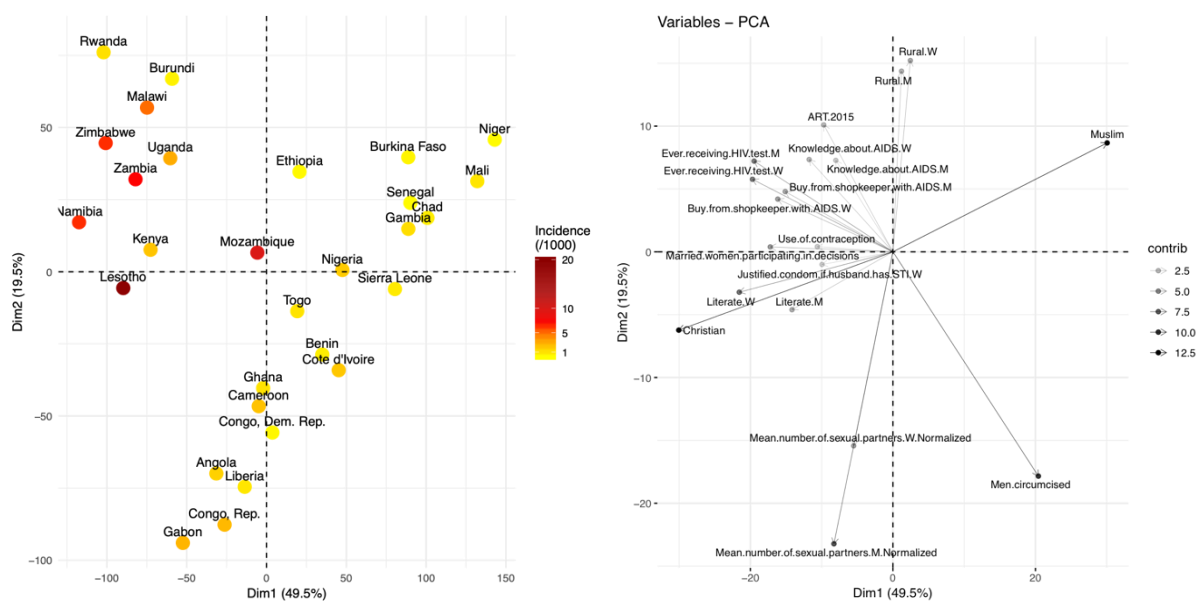

422

423 **Figure 2 - Hierarchical clustering of 29 sub-Saharan African countries**

424 **Left panel: Dendrogram.** Cutting the tree at the height of the red dashed line results in  
 425 three clusters, highlighted in yellow, orange and red.

426 **Right panel: Average Silhouette width for different numbers of clusters.** The number of  
 427 clusters (X axis), from 2 to 10, corresponds to different heights at which the dendrogram  
 428 was cut. The maximum average Silhouette width was obtained for 3 clusters (red circle).

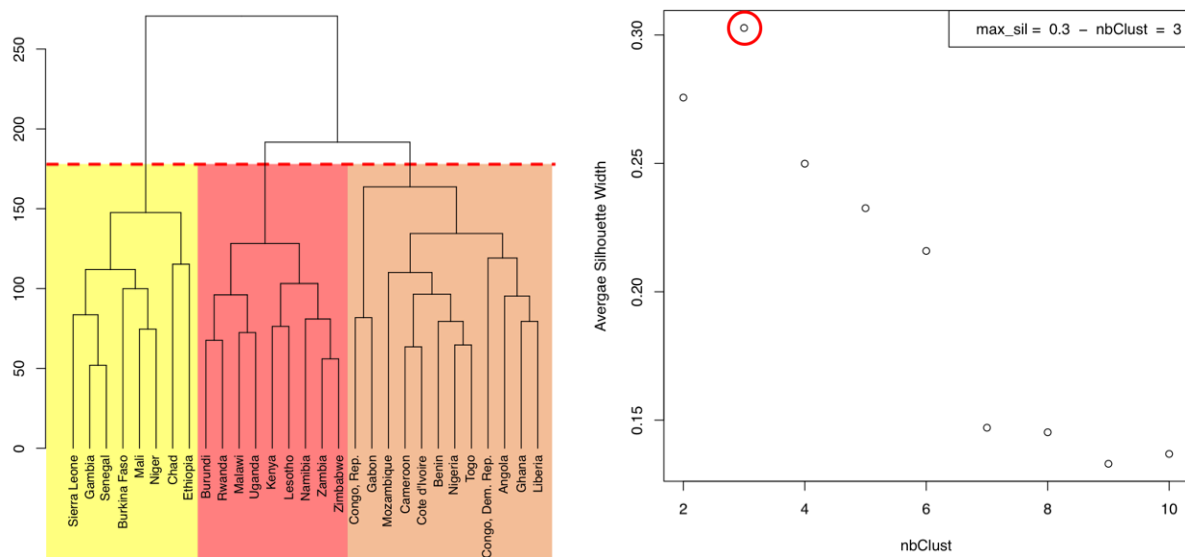

429

430 **Figure 3 - Analysis of the resulting clusters.**

431 **Left panel: Map of clustered sub-Saharan countries.** Countries are coloured based on the  
 432 cluster to which they belong.

433 **Right panel: Box plots of the HIV incidence distribution within each cluster.**

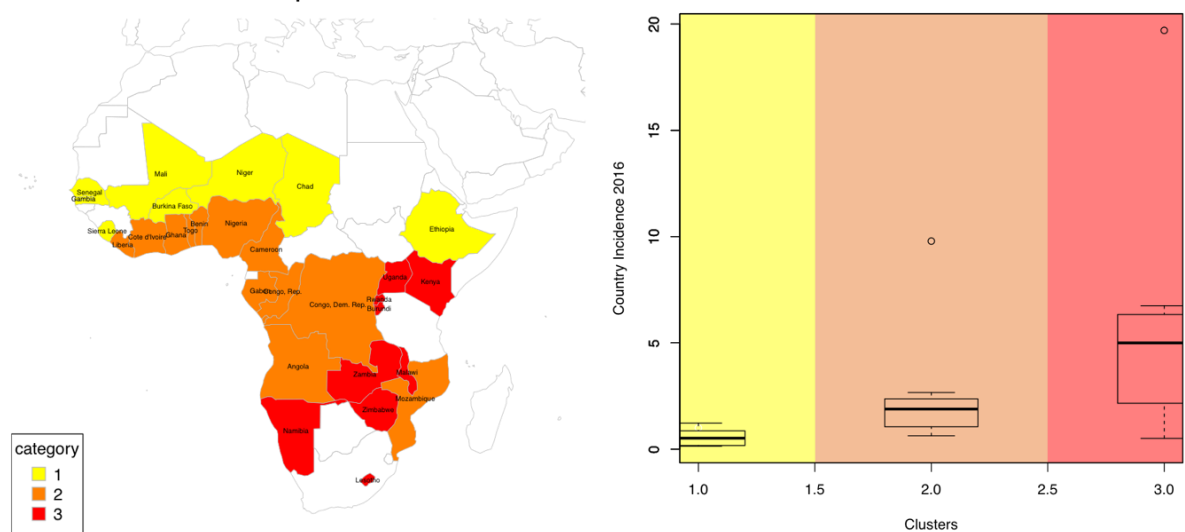

434

435

436 **Figure 4 - Analysis of the resulting clusters in terms of their sociobehavioural**  
437 **characteristics.** Density plots per cluster of (a) the percentage of Muslim population, (b) the  
438 percentage of circumcised men, (c) the mean number of sexual partners in a man's lifetime,  
439 (d) the percentage of literate women, (e) the percentage of men who have ever received an  
440 HIV test, (f) the percentage of men who say they would buy fresh vegetables from a vendor  
441 whom they knew was HIV+, (g) the percentage of women with a comprehensive knowledge  
442 about AIDS and (h) the ART coverage in 2015.

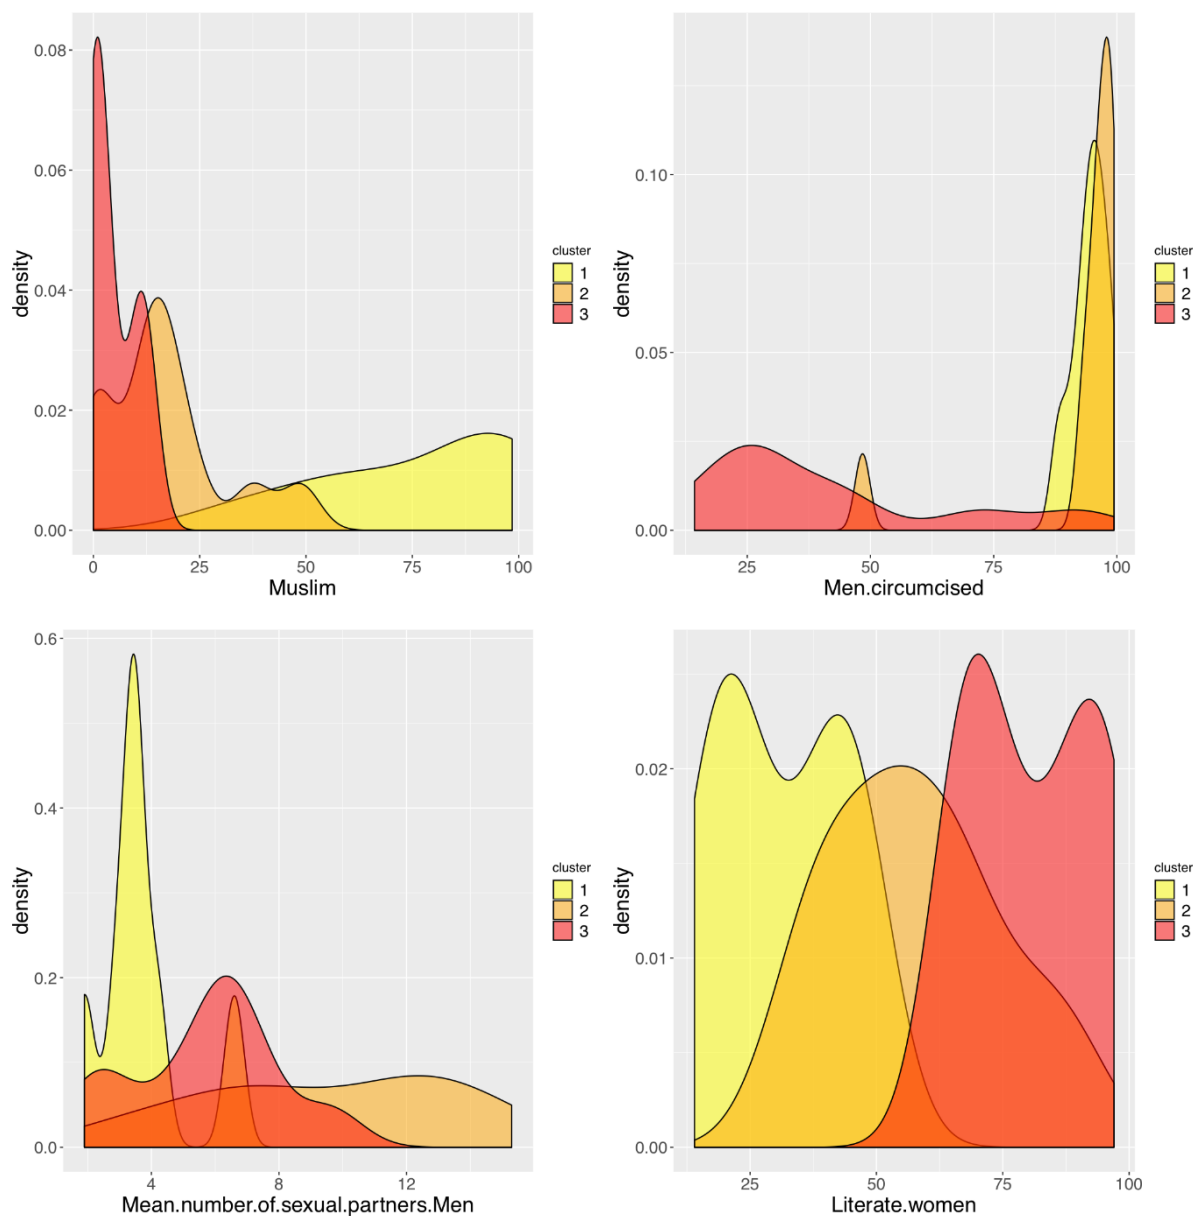

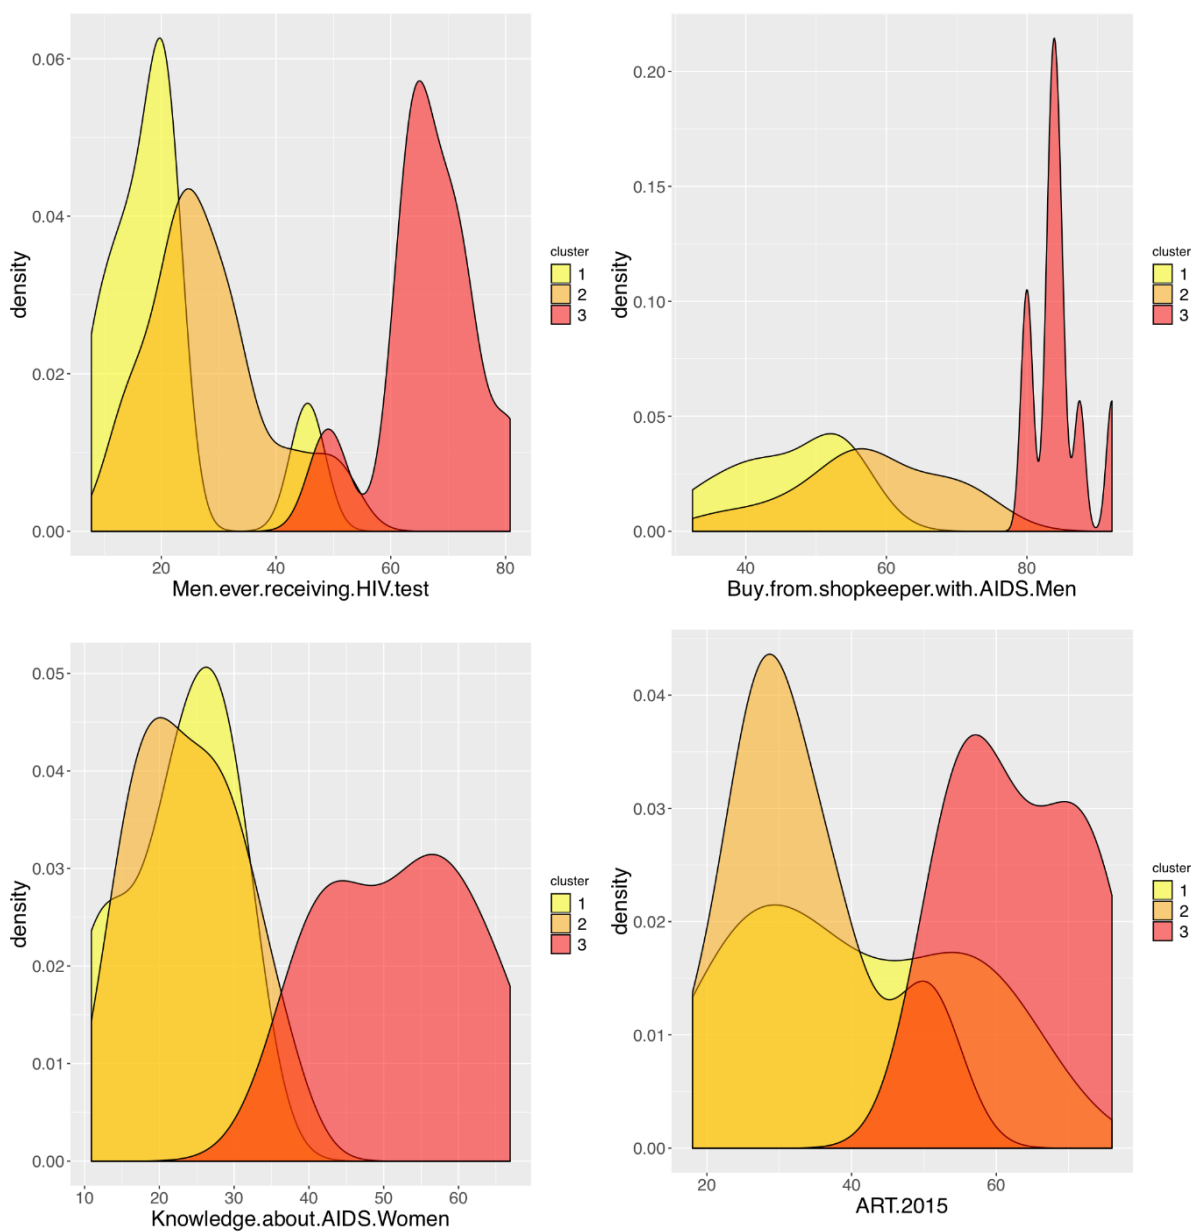

443
